# Supplementary material for: Curcumin-encapsulated Pluronic micelles in chitosan/PEO nanofibers: a controlled release strategy for wound healing applications
Source: publisher site journal article supplement (doi:10.1515/polyeng-2024-0182), 2025-01-27
Supplement: Supplementary file 1 [file j_polyeng-2024-0182_suppl_001.docx]

**Supplementary Material**

**Curcumin-encapsulated Pluronic micelles in chitosan/PEO nanofibers: a controlled release strategy for wound healing applications**

Zahra Kharat et al.

DOI 10.1515/polyeng-2024-0182

**
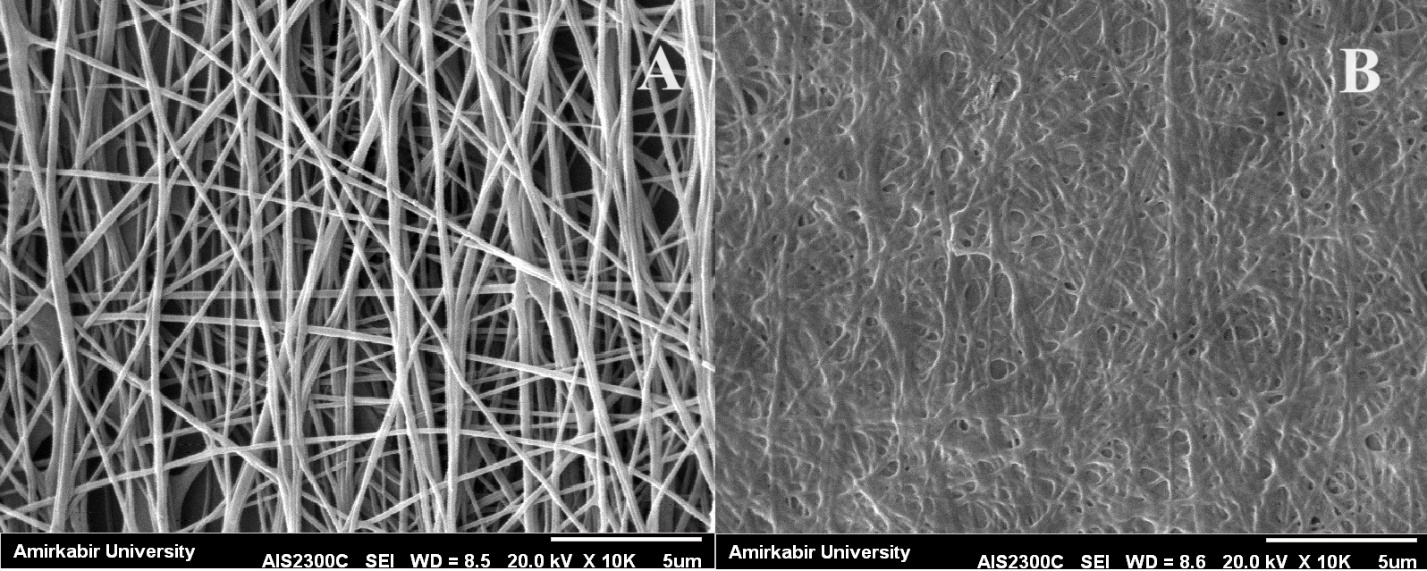
**

**Supplementary Figure S1:** SEM images of nanofibers (A) cross-linked and (B) non-cross-linked after 24 h of immersion in water. The lost fibrous structure of the non-cross-linked sample is clearly visible.
